# Supplementary material
Source: publisher figshare collection journal article supplement (https://future-science-group.figshare.com/articles/dataset/_/24117963)
Supplement: Supplementary file 1 [file 1]

Supplementary Figure 1. Risk of bias assessment of the included RCTs

|                                                     | D1 | D2 | D3 | D4 | D5 | Overall |
|-----------------------------------------------------|----|----|----|----|----|---------|
| CheckMate9ER,<br>Motzer et al.                      | +  | +  | +  | +  | +  | +       |
| JAVELIN Renal 101,<br>Motzed et al. Choueiri et al. | +  | +  | +  | +  | +  | +       |
| KEYNOTE-426,<br>Powles et al.                       | +  | +  | +  | +  | +  | +       |
| CheckMate214,<br>Motzer et al.                      | +  | +  | +  | +  | ±  | ±       |
| CLEAR,<br>Motzer et al.                             | +  | +  | +  | +  | +  | +       |

D1: Bias arising from the randomization process  
D2: Bias due to deviations from intended interventions  
D3: Bias due to missing outcome data  
D4: Bias in measurement of the outcome  
D5: Bias in selection of the reported result

+

Low

-

High

±

Some concerns
