# Supplementary material
Source: publisher figshare collection journal article supplement (https://future-science-group.figshare.com/articles/dataset/_/24117963)

**Supplementary Figure 3.** Forest plots showing the association of the efficacy of first-line ICI-based combination therapy with oncologic outcomes in older patients with mRCC stratified by patients aged 65-74 and  $\geq 75$  years: (A) OS, (B) PFS

### (A) Overall survival

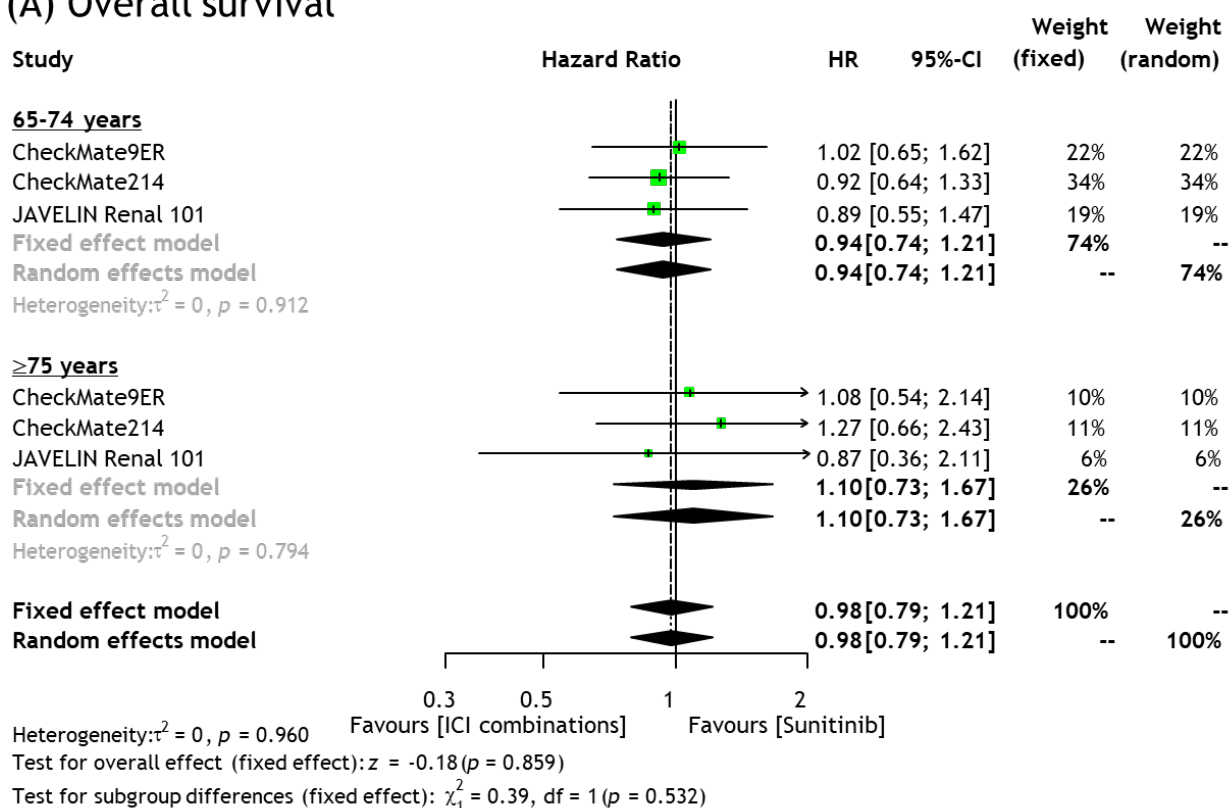

### (B) Progression-free survival

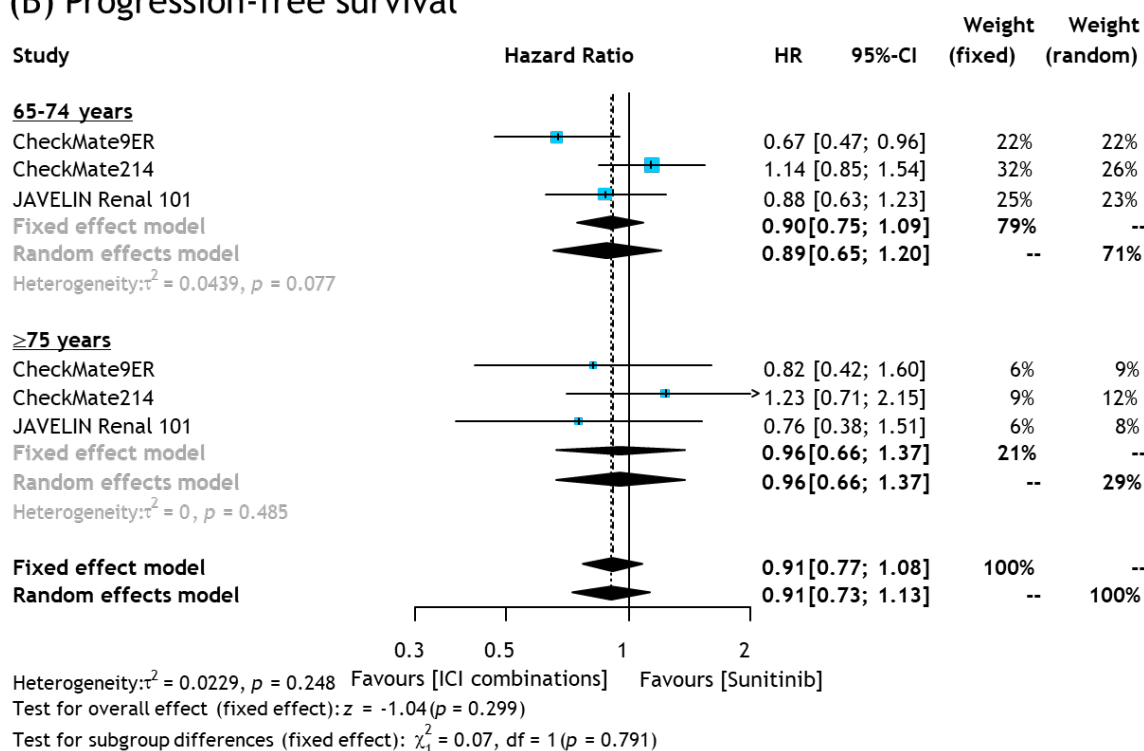

Supplement: Supplementary file 2 [file 1]
