# Supplementary material
Source: publisher figshare collection journal article supplement (https://future-science-group.figshare.com/articles/dataset/_/24117963)

**Supplementary Figure 2.** Funnel plots of pooled HRs or ORs of ICI-based combination therapy for mRCC; (A) OS, (B) ORR (C) PFS

(A)

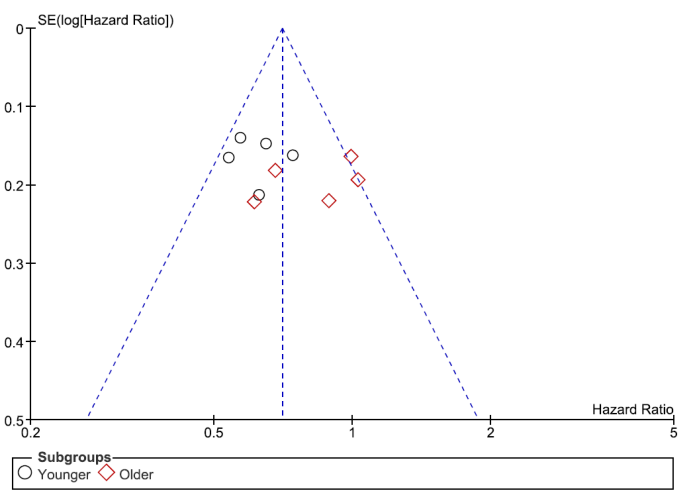

(B)

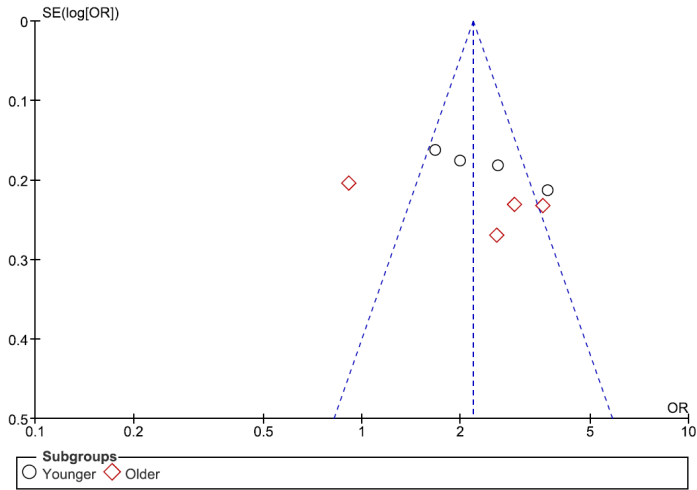

(C)

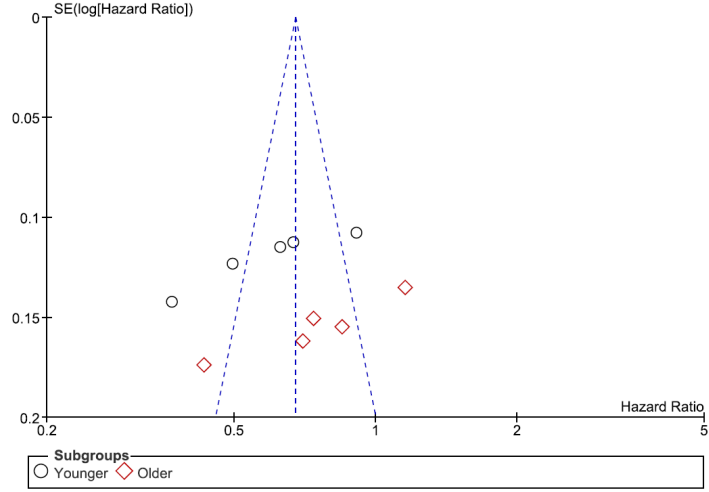

Supplement: Supplementary file 3 [file 1]
