# Supplementary material
Source: publisher figshare collection journal article supplement (https://future-science-group.figshare.com/articles/dataset/_/24117963)

**Supplementary Figure 5.** Forest plots and SUCRA graph from NMAs for PFS in mRCC patients treated with first-line ICI-based combination therapy; (A) younger (<65 years) and (B) older (≥65 years)

### (A) Younger patients

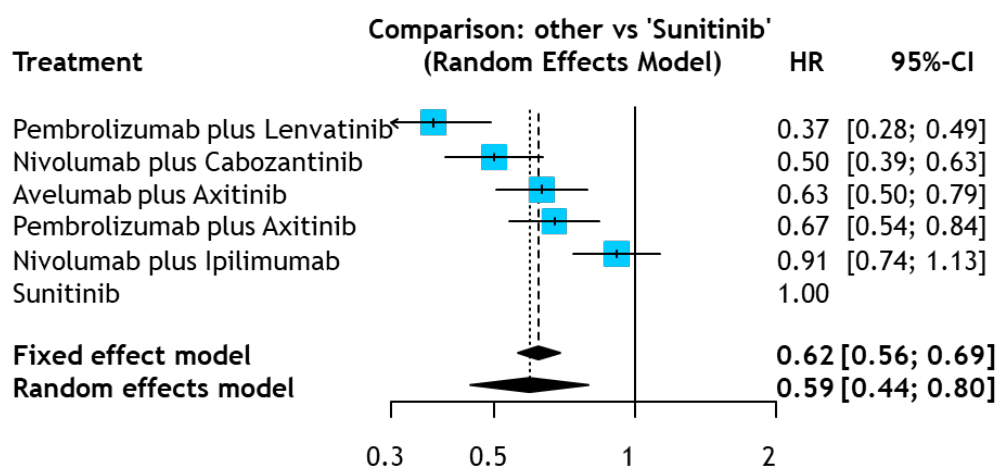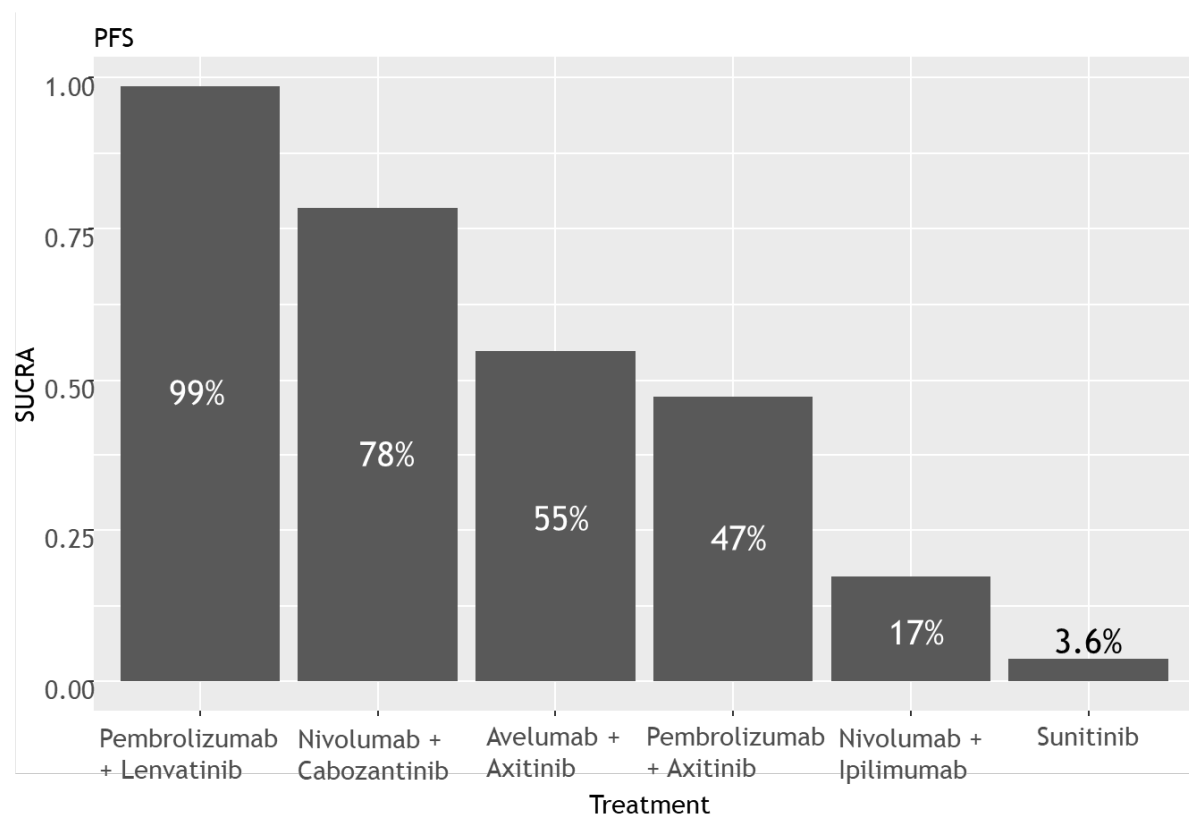

(B) Older patients

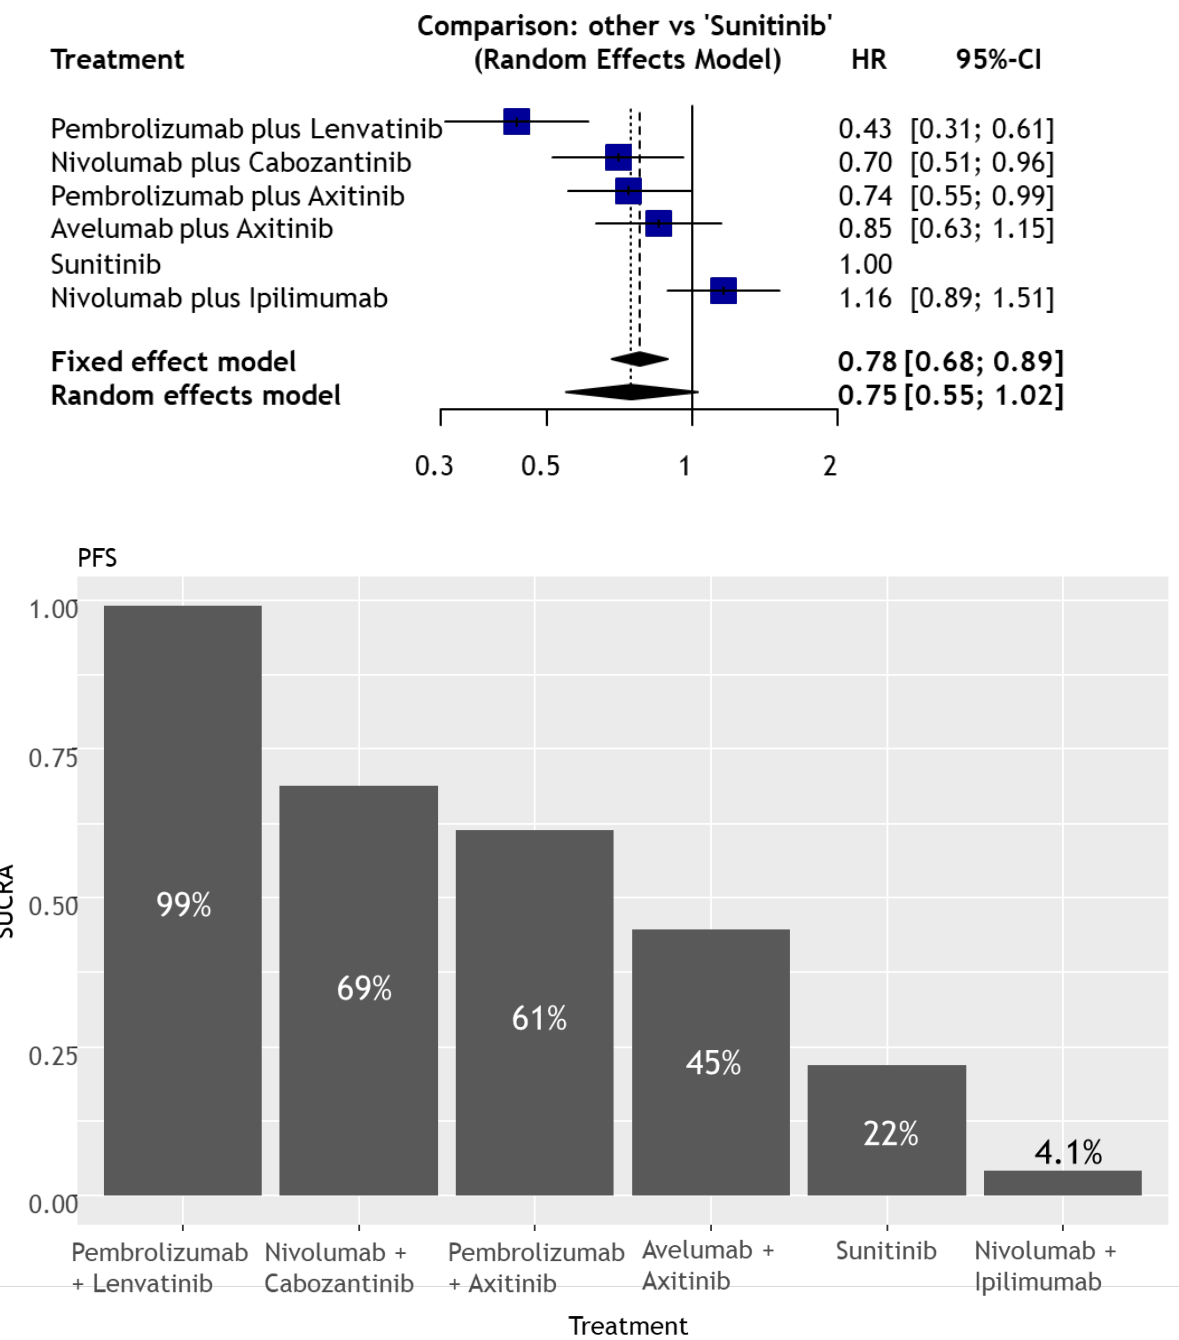

Supplement: Supplementary file 4 [file 1]
