# Supplementary material
Source: publisher figshare collection journal article supplement (https://future-science-group.figshare.com/articles/dataset/_/24117963)

**Supplementary Figure 4.** Network plots showing the association of ICI-based combination therapy for OS and PFS in mRCC patients as 1<sup>st</sup>-line treatment

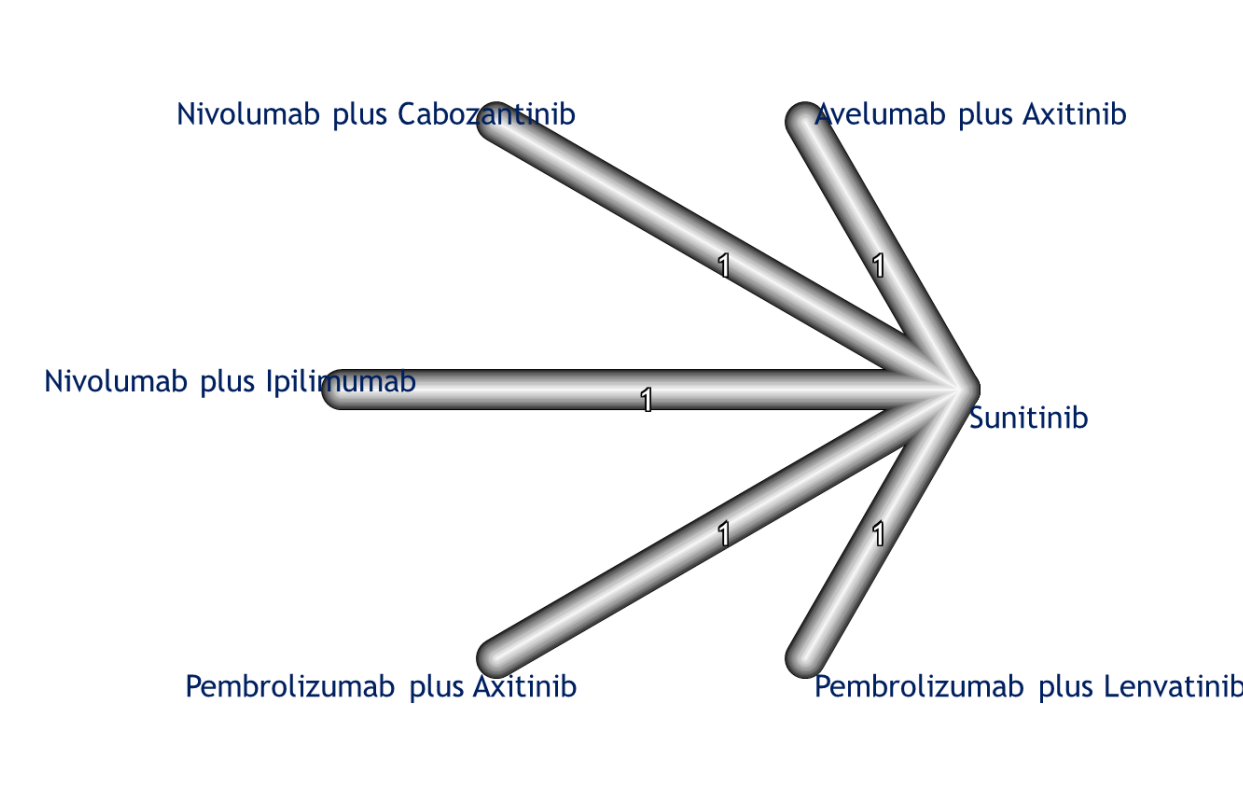

Supplement: Supplementary file 5 [file 1]
